# Supplementary material
Source: PubMed Central journal article supplement (PMC7155917)
Supplement: NIHMS1068936-supplement-Supplemental_Material.pdf [file NIHMS1068936-supplement-Supplemental_Material.pdf]

## PARENTING AND NEURAL SUBSTRATES OF ER

### Supplemental Information

*Details of literature search.* We review all child/adolescent neuroimaging studies of emotional reactivity/regulation that incorporated a *direct* measure of parenting behavior, including questionnaire and observational measures of ERSB behaviors and parenting style/quality that were accepted to for publication before January 2019. Neuroimaging studies that examined associations between emotional processing and parental availability using images of parents' facial expressions as stimuli during a functional MRI scan (e.g., viewing pictures of mothers vs. female strangers) or those that compared youth's brain activation when completing fMRI paradigms with mother present vs. alone were not included. Additionally, studies had to include a measure(s) of brain volume, morphology, and structural connectivity or functional connectivity and activation in brain regions implicated in ER-related processes (amygdala, hippocampus, striatal regions, OFC, ACC, and PFC; Phillips et al., 2008). Using the search terms "MRI/diffusion tensor imaging/brain structure/brain development", "child/adolescent functional connectivity/resting state connectivity/DTI", and "child/adolescent fMRI, neuroimaging in combination with "parent/parenting behaviors/maternal behaviors", we identified 34 empirical studies investigating associations between *normative variations* in parenting behavior and brain structure/functional activation/structural and functional connectivity (see Table 1). All searches were conducted using PsychInfo, PubMed, and Google Scholar; reference sections from included studies were also reviewed to ensure that we did not miss relevant studies. Reference sections from included studies were also reviewed to ensure that relevant work was not missed.

## PARENTING AND NEURAL SUBSTRATES OF ER

Supplemental Information: Table 1. Summary of key findings from empirical studies of associations between parenting behavior and neuroimaging indices of youth's emotional reactivity and regulation processes

| STUDY                | SAMPLE (YOUTH) CHARACTERISTICS                                                                                                                                        | PARENTING MEASURE                                                                                                                                             | PARENTAL ERSB                 | NEUROIMAGING MEASURE & TASK PARADIGM | NEURAL REGIONS/ CIRCUITRY                                                                              | PARENTING-NEURAL SUBSTRATE ASSOCIATIONS                                                                               | MODERATORS       |
|----------------------|-----------------------------------------------------------------------------------------------------------------------------------------------------------------------|---------------------------------------------------------------------------------------------------------------------------------------------------------------|-------------------------------|--------------------------------------|--------------------------------------------------------------------------------------------------------|-----------------------------------------------------------------------------------------------------------------------|------------------|
| STRUCTURAL STUDIES   |                                                                                                                                                                       |                                                                                                                                                               |                               |                                      |                                                                                                        |                                                                                                                       |                  |
| Avants et al., 2015  | Children: N=52, healthy (sample recruited for high SES stress)<br>-parenting measure at age 4y (M=4.1) and 8y (M=8.4)<br>-brain measure at late adolescence (M=19.16) | Home-based interview of parenting quality (mothers only): Nurturance and environmental stimulation scales from the Home Measurement of the Environment (HOME) | N/A (parenting style/quality) | Resting state, structural volume     | cortex, PFC and temporal regions                                                                       | ↑environmental stimulation, ↓cortical thickness in temporal cortex and PFC                                            |                  |
| Bernier et al., 2018 | Children: N=33, healthy<br>-parenting measures at age 1y (M=13.02mos);<br>-brain measure at age 10-11y (M=11.67)                                                      | Observed maternal behavior (sensitivity): Care, accessibility, and availability scales from the Maternal Behavior Q-Sort (MBQS)                               | N/A (parenting style/quality) | Resting state, structural volume     | amygdala, hippocampus                                                                                  | -↑maternal accessibility/availability, ↓right amygdala volume<br>-↑maternal positivity, ↓bilateral hippocampal volume |                  |
| Buss et al., 2007    | Adults: N=44, healthy (born small for gestational age)<br>-multi-wave parenting assessment<br>-brain measure at age 23y (M=23.32)                                     | "Youth"-report (retrospective, over first 16 years of life) of maternal behaviors: Care from the Parental Bonding Inventory (PBI)                             | N/A (parenting style/quality) | Resting state, structural volume     | hippocampus                                                                                            | <u>Moderation</u> : ↓maternal care, ↓hippocampal volume only for females who were small for gestational age           | sex, birthweight |
| Kim et al., 2010     | Adults: N=26; age 19-47y (M=32.7)                                                                                                                                     | "Youth"-report of (retrospective, first 16 years of life) maternal behaviors: Care subscale from the Parent Bonding Behavioral Instrument (PBI)               | N/A (parenting style/quality) | Resting state, structural volume     | superior and middle frontal gyrus, orbital gyrus, fusiform gyrus, superior temporal gyrus, hippocampus | ↑maternal care, ↑GM volume in superior/middle frontal gyri, orbital gyrus, superior temporal gyrus and fusiform gyrus |                  |

## PARENTING AND NEURAL SUBSTRATES OF ER

|                     |                                                                                                                                                                                                         |                                                                                                                                                  |                               |                                                          |                                                                                  |                                                                                                                                                                                           |                                                                    |
|---------------------|---------------------------------------------------------------------------------------------------------------------------------------------------------------------------------------------------------|--------------------------------------------------------------------------------------------------------------------------------------------------|-------------------------------|----------------------------------------------------------|----------------------------------------------------------------------------------|-------------------------------------------------------------------------------------------------------------------------------------------------------------------------------------------|--------------------------------------------------------------------|
| Kok et al., 2015    | Children: N=191, healthy<br>-parenting measure at ages 1y, 3y, and 7y;<br>-brain measure at age 8y (M=8.04)                                                                                             | Observed parenting (mother and father) quality: Sensitivity coded during free play and challenging task (for the child)                          | N/A (parenting style/quality) | Resting state, structural volume & gray matter volume    | precentral, postcentral, caudal middle frontal, and rostral middle frontal gyrus | ↑parental sensitivity, ↑total structural volume, GM volume, and cortical thickness in the precentral, postcentral, caudal middle frontal, and rostral middle frontal gyrus                |                                                                    |
| Little et al., 2015 | Adolescents: N=174, sampled for an even distribution of temperamental risk for depression; age 11-13y (M = 12.7)                                                                                        | Observed maternal behavior: Aggressive and positive parenting coded during event planning and problem-solving parent-adolescent discussion tasks | N/A (parenting style/quality) | Resting state, structural volume (gray matter)           | hippocampus                                                                      | <u>Moderation</u> : ↓positive parenting, ↓hippocampal volume for youth with S-alleles of 5HT gene<br><br>Note: This association is predicted with MDD symptoms 6 yrs later                | GxE interaction (5HT S allele associated with risk for depression) |
| Luby et al., 2012   | Children: N=92, healthy & elevated depressive symptoms<br>-parenting measure at age 3-5y<br>-brain measure at age 7-13y (M=9.34)                                                                        | Observed maternal behavior: Support coded during frustrating challenge (for the child)                                                           | N/A (parenting style/quality) | Resting state, structural volume (gray matter)           | hippocampus                                                                      | ↑maternal support, ↑hippocampal volume<br><br><u>Moderation</u> : positive association is greater in non-depressed vs. depressed children                                                 | Youth depression status                                            |
| Luby et al., 2013   | Children: N=145, healthy & elevated depressive symptoms<br>-parenting measure at age 4-7y<br>-brain measure at age 6-12y (M=9.78)                                                                       | Observed maternal behavior: Support and hostility coded during frustrating challenge (for the child)                                             | N/A (parenting style/quality) | Resting state, structural volume (gray and white matter) | hippocampus                                                                      | -↓support/↑ hostility, ↓white matter, cortical GM, and hippocampal and amygdala volumes<br><br>-association between ↑poverty and ↓hippocampal volume mediated by negative parenting style |                                                                    |
| Luby et al., 2016   | Children: N=127, healthy & elevated depressive symptoms<br>-parenting measure at ages 3-6y and 6-12y<br>-brain measure at age 6-12y (M=10.56), with two more neuroimaging assessments 1.5y and 3y later | Observed maternal behavior: Supportive behaviors coded during mild stressful tasks (for child)                                                   | N/A (parenting style/quality) | Resting state, structural volume (gray matter)           | hippocampus                                                                      | <u>Moderation</u> : ↑maternal support at preschool age (vs. school age), ↑growth in hippocampal volume                                                                                    | Developmental timing of parenting experience                       |

## PARENTING AND NEURAL SUBSTRATES OF ER

|                            |                                                                                                                                                   |                                                                                                                                                                                            |                               |                                                |                                                                            |                                                                                                                                                                       |                                              |
|----------------------------|---------------------------------------------------------------------------------------------------------------------------------------------------|--------------------------------------------------------------------------------------------------------------------------------------------------------------------------------------------|-------------------------------|------------------------------------------------|----------------------------------------------------------------------------|-----------------------------------------------------------------------------------------------------------------------------------------------------------------------|----------------------------------------------|
| Narita et al., 2010        | Adults: N=50, healthy; age 20-29y (M=24.8)                                                                                                        | "Youth"-report of (retrospective, first 16 years of life) maternal behaviors: Overprotection/control and care subscales from the Parent Bonding Behavioral Instrument (PBI)                | N/A (parenting style/quality) | Resting state, structural volume (gray matter) | dIPFC                                                                      | ↑parental care, ↑left dIPFC volume; ↑parental overprotection, ↓left dIPFC volume                                                                                      |                                              |
| Narita et al., 2012        | Adults: N=40, healthy; age 18-35y (M=27.2)                                                                                                        | "Youth"-report (retrospective, first 16 years of life) of maternal behaviors: Overprotection/control and care subscales from the Parent Bonding Behavioral Instrument (PBI)                | N/A (parenting style/quality) | Resting state, structural volume (gray matter) | hippocampus                                                                | No association between PBI parenting style measures & hippocampal volume<br>Note: ↑overprotection, ↓HPA axis reactivity and ↓HPA axis reactivity, ↓hippocampal volume |                                              |
| Rao, et al., 2010          | Adolescents: N=49 (all African-American), prenatal exposure to cocaine -parenting measure at ages 4y and 8y -brain measure at age 13-16y (M=14.2) | Observed + home-based interview of parenting behavior of mothers and paternal figures: Nurturance and environmental stimulation scales from the Home Measurement of the Environment (HOME) | N/A (parenting style/quality) | Resting state, structural volume (gray matter) | hippocampus                                                                | Moderation: ↑Parental nurturance at age 4, ↓hippocampal volume; No association between parental nurturance at age 8 & hippocampal volume                              | Developmental timing of parenting experience |
| Rifkin-Graboi et al., 2015 | Children: N=32, in-utero exposure to cocaine; age 6 months<br><i>(24 with useable neuroimaging data)</i>                                          | Observed maternal behavior: Sensitivity coded during free play                                                                                                                             | N/A (parenting style/quality) | Resting state, structural volume (gray matter) | hippocampus, amygdala                                                      | ↓maternal sensitivity, ↑hippocampal volume                                                                                                                            |                                              |
| Schneider et al., 2012     | Adolescents: N=64, healthy; age 14y (M=14.24)                                                                                                     | Mother-report of interpersonal style: Love/affiliation subscale from the Inventory of Interpersonal Problems (IIP)                                                                         | N/A (parenting style/quality) | Resting state, structural volume (gray matter) | hippocampal and orbitofrontal gray matter density; ventral striatum volume | ↑maternal interpersonal affiliation style, ↑ density in hippocampus and OFC<br>↑maternal affiliation, ↑ventral striatal volume                                        | Sex                                          |

## PARENTING AND NEURAL SUBSTRATES OF ER

|                      |                                                                                                                 |                                                                                                                                                                                                                                                                                                           |                                    |                                                                                                                             |                                                                                                                               |                                                                                                                                                                                                                                                                                                                                                                                                                                                                                                                                                                                                  |                                    |
|----------------------|-----------------------------------------------------------------------------------------------------------------|-----------------------------------------------------------------------------------------------------------------------------------------------------------------------------------------------------------------------------------------------------------------------------------------------------------|------------------------------------|-----------------------------------------------------------------------------------------------------------------------------|-------------------------------------------------------------------------------------------------------------------------------|--------------------------------------------------------------------------------------------------------------------------------------------------------------------------------------------------------------------------------------------------------------------------------------------------------------------------------------------------------------------------------------------------------------------------------------------------------------------------------------------------------------------------------------------------------------------------------------------------|------------------------------------|
| Sheikh et al., 2014  | Children (all female):<br>N=45, healthy<br>-parenting measure at age 3y<br>-brain measure at age 6y<br>(M=6.13) | Observed parental emotion<br>Positive and negative affect coded during parent-child interactions (from Teaching Tasks Battery) using the Qualitative Ratings for Parent-Child Interactions<br><br>Note: no details regarding how paternal vs. maternal behaviors were separately assessed and/or analyzed | Parental emotional expression      | Resting state, white matter volume and connectivity<br><br>Fractional anisotropy (FA)<br><br><u>Paradigm:</u> resting-state | left thalamus, right anterior ACC, right superior frontal gyrus<br><br>white matter microstructure adjacent to limbic regions | <u>Moderation:</u> high stress-reactive females, ↑parental positive affect, ↑FA (white matter) in regions adjacent to the left thalamus, right ACC, and right superior frontal gyrus (showing white matter structure more similar to that of low stress-reactive females)<br><br>↑positive parental affect, ↑FA (white matter) in regions adjacent to the rACC and superior frontal gyrus (sFG)<br><br><u>Moderation:</u> Females with ↑cortisol reactivity had ↓FA values (vs. girls with ↓cortisol reactivity) in white matter microstructure adjacent to the left thalamus, the rACC, and sFG | Youth cortisol (stress) reactivity |
| Whittle et al., 2009 | Adolescents: N=113, sampled for an even distribution of temperamental risk for depression; age 11-13y (M=12.5)  | Observation of maternal mothers' responses to youth's emotion: Mothers' punishing responses coded during event planning and problem-solving parent-adolescent discussion tasks                                                                                                                            | Parental response to child emotion | Resting state, structural volume (gray matter)                                                                              | dorsal ACC, OFC, amygdala                                                                                                     | -↑maternal punishing responses to adolescent positive affect, ↑left dACC and bilateral OFC volumes<br><br><u>Moderation:</u> for boys, ↑maternal punishing responses to adolescent positive affect, ↑right amygdala volumes.                                                                                                                                                                                                                                                                                                                                                                     | Sex                                |
| Whittle et al., 2014 | Adolescents: N=188, sampled for an even distribution of temperamental risk for depression; age 11-13y (M=12.62) | Observed maternal behaviors: Positive behavior coded during event planning and problem-solving parent-child discussion tasks                                                                                                                                                                              | N/A (parenting style/quality)      | Resting state, structural volume (gray matter)                                                                              | amygdala, right ACC, right and left orbitofrontal cortices                                                                    | -↑positive maternal behavior, ↓volumetric growth in the right amygdala<br><br><u>Moderation:</u><br>-↑positive maternal behavior, ↑cortical thinning in bilateral OFC<br>-↑positive maternal behavior, ↑cortical thinning in the right ACC                                                                                                                                                                                                                                                                                                                                                       | Sex                                |

## PARENTING AND NEURAL SUBSTRATES OF ER

|                      |                                                                                                                                                                                                                        |                                                                                                                                        |                               |                                                |                                      |                                                                                                                                                                                                                                                                                                                                                                                                                                                                                                                                   |                                                        |
|----------------------|------------------------------------------------------------------------------------------------------------------------------------------------------------------------------------------------------------------------|----------------------------------------------------------------------------------------------------------------------------------------|-------------------------------|------------------------------------------------|--------------------------------------|-----------------------------------------------------------------------------------------------------------------------------------------------------------------------------------------------------------------------------------------------------------------------------------------------------------------------------------------------------------------------------------------------------------------------------------------------------------------------------------------------------------------------------------|--------------------------------------------------------|
| Whittle et al., 2016 | Adolescents: N=166 (86 females) sampled for an even distribution of temperamental risk for depression<br>-parenting measure at age 12y (M=12.79)<br>-brain measure at ages 12y (M=12.79), 16y (M=16.70), & 19y (19.08) | Observed maternal behavior: Aggressive behavior coded during event planning and problem-solving parent-adolescent interaction tasks    | N/A (parenting style/quality) | Resting state, structural volume (gray matter) | cortex, nucleus accumbens,           | <u>Moderation:</u> all associations significant only for males<br>-↑maternal aggressive behavior, ↑increases in cortical thickness in the superior frontal gyrus, superior parietal lobe and supramarginal gyrus from early to late adolescence<br>-↓maternal aggressive behavior, ↓decrease in nucleus accumbens volume from early to mid-adolescence whereas ↑aggression, ↓decrease in nucleus accumbens volume from early to late adolescence.                                                                                 | Sex, developmental timing of brain measure             |
| Whittle et al., 2017 | Adolescents: N=166, healthy (86 females), sampled for an even distribution of temperamental risk for depression<br>-parenting measure at 11-13y (M=12.79)<br>-brain measure at ages 11-13y and at 4y and 6y later      | Observed maternal parenting behavior: Positive parenting during event planning and problem-solving parent-adolescent interaction tasks | N/A (parenting style/quality) | Resting state, structural volume (gray matter) | OFC, dorsal frontal cortex, amygdala | <u>Moderation:</u> ↑positive maternal behavior, ↑growth in left amygdala volume for adolescents whose parents reported high-status occupations for females & males<br>-↑positive maternal behavior, ↓cortical thinning in lateral OFC and dorsal frontal cortex, only for males who experienced greater neighborhood disadvantage (i.e., neurodevelopmental trajectories more closely resembled those with low levels of disadvantage)<br>-↑positive maternal behavior, ↑growth in amygdala volume for males with high SES stress | Sex; SES-related stress (neighborhood economic status) |
| Yang et al., 2018    | Adults: N=181, healthy; undergraduates (M=22.39y)                                                                                                                                                                      | Youth-report of maternal behaviors: Warmth subscale from the <i>Egna Minnen Beträffande Uppfostran (EMBU-C)</i>                        | N/A (parenting style/quality) | Resting state, gray matter volume              | PFC                                  | ↑maternal emotional warmth ↓dmPFC and lateral rostral PFC volume                                                                                                                                                                                                                                                                                                                                                                                                                                                                  |                                                        |
| FUNCTIONAL STUDIES   |                                                                                                                                                                                                                        |                                                                                                                                        |                               |                                                |                                      |                                                                                                                                                                                                                                                                                                                                                                                                                                                                                                                                   |                                                        |

## PARENTING AND NEURAL SUBSTRATES OF ER

|                          |                                                                                                                     |                                                                                                                                                                                                                                                                                                                                                   |                               |                                                                                                                                                                                                                                                                                                                        |                                                                                       |                                                                                                                                                                                                                                                                                                                                                                                                                                                                                                                                                                                                            |                                   |
|--------------------------|---------------------------------------------------------------------------------------------------------------------|---------------------------------------------------------------------------------------------------------------------------------------------------------------------------------------------------------------------------------------------------------------------------------------------------------------------------------------------------|-------------------------------|------------------------------------------------------------------------------------------------------------------------------------------------------------------------------------------------------------------------------------------------------------------------------------------------------------------------|---------------------------------------------------------------------------------------|------------------------------------------------------------------------------------------------------------------------------------------------------------------------------------------------------------------------------------------------------------------------------------------------------------------------------------------------------------------------------------------------------------------------------------------------------------------------------------------------------------------------------------------------------------------------------------------------------------|-----------------------------------|
| Barbosa et al., 2018     | Children, N=90 (46 female), healthy; age 8-9y (M=9.42)                                                              | Parent-report of 5 parenting styles: 1) involvement, 2) positive reinforcement practices, 3) poor monitoring/supervision, 4) inconsistent discipline, and 5) corporal punishment from the Alabama Parenting Questionnaire (APQ-PR)<br><br>Note: no details regarding how paternal vs. maternal behaviors were separately assessed and/or analyzed | N/A (parenting style/quality) | Emotional processing (reactivity & regulation)<br><br><u>Paradigm:</u> Viewing of emotional facial expressions<br><u>Emotion:</u> Happy, angry, fearful<br><u>Contrast:</u> Emotional (happy, angry, fearful) vs. calm face                                                                                            | ROI analysis of frontal and subcortical regions                                       | ↓parental monitoring/supervision, ↓left vmPFC activation to fear faces<br><br><u>Moderation:</u> ↑parental corporal punishment, ↓vlPFC activation to fearful faces for relatively late-pubertal females, but ↑vlPFC activation for late-pubertal males<br>-↑parental corporal punishment, ↓left dlPFC, frontal pole, and anterior insula activation to happy faces for late-pubertal females and ↓activation in left dlPFC, frontal pole, and anterior insula for late-pubertal males<br>-↑parental corporal punishment, ↓hippocampal activation to happy faces for late-pubertal females <i>and</i> males | Sex, Pubertal (Adrenarche status) |
| Butterfield et al., 2019 | N=120 anxious and healthy youth (71 female), age 9-14y (M=11.56)<br><br>Note: 114 mothers, 1 grandmother, 4 fathers | Observed parental engagement-oriented coping socialization (e.g., encouragement of youth to use problem-solving, to approach challenges, and try cognitive reframing) during anxiety-eliciting parent-youth discussion tasks (discussion of a recent worry, preparation for a public speech)                                                      | Parental emotion coaching     | Emotional processing (reactivity & regulation)<br><br><u>Paradigm:</u> Viewing/Rating of emotional and non-emotional words<br><u>Emotion:</u> Positive, Threat (physical & social threat), Neutral<br><u>Contrast:</u> Physical threat vs. baseline, accounting for ROI activations from neutral vs. baseline contrast | ROI analysis of amygdala, anterior insula, sgACC, pgACC, rostral cingulate, and vlPFC | <u>Moderation</u><br>For anxious youth: ↑parental engagement-oriented coping socialization, ↑bilateral anterior insula and pgACC activation to threat words.<br><br>Note: Association between ↑parental engagement-oriented coping socialization and ↓avoidant coping partially mediated by increased neural activation<br><br>For healthy youth: ↑parental engagement-oriented coping socialization, ↓bilateral anterior insula and pgACC activation to threat words                                                                                                                                      | Youth anxiety diagnosis           |

## PARENTING AND NEURAL SUBSTRATES OF ER

|                                 |                                                                                                                                                |                                                                                                                                                                                                                                                        |                               |                                                                                                                                                                                                                                                             |                                                                                      |                                                                                                                                                                                                                                                                                                                                                                                                                                    |                                        |
|---------------------------------|------------------------------------------------------------------------------------------------------------------------------------------------|--------------------------------------------------------------------------------------------------------------------------------------------------------------------------------------------------------------------------------------------------------|-------------------------------|-------------------------------------------------------------------------------------------------------------------------------------------------------------------------------------------------------------------------------------------------------------|--------------------------------------------------------------------------------------|------------------------------------------------------------------------------------------------------------------------------------------------------------------------------------------------------------------------------------------------------------------------------------------------------------------------------------------------------------------------------------------------------------------------------------|----------------------------------------|
| Casement et al., 2014           | N=120 (all female), healthy (oversampled for high SES stress)<br>-parent measure at age 11-12y (11.81)<br>-brain measure at age 15-16y (15.26) | Parent-report of parenting behavior: Warmth subscale from the Parent-Child Rating Scale<br><br>Note: no details regarding how paternal vs. maternal behaviors were separately assessed and/or analyzed                                                 | N/A (parenting style/quality) | Emotional processing (reactivity & regulation):<br>Anticipation of monetary reward<br><br><u>Paradigm:</u> Guessing Task<br><u>Emotion:</u> Reward (Gain) vs. Loss<br><u>Contrast:</u> Reward anticipation vs. Baseline                                     | ROI analysis of striatum, dmPFC, OFC, and amygdala                                   | ↓parental warmth, ↑dmPFC and ventral striatum activation during reward anticipation<br><br>Note: Association between ↓parental warmth and later youth depressive symptoms mediated by adolescent dmPFC activation                                                                                                                                                                                                                  |                                        |
| Chaplin et al., <i>in press</i> | Adolescents: N=66 (32 female), healthy; age 12-14y (M=12.59)                                                                                   | Observed maternal parenting behaviors: Warmth and negative (criticisms, harsh tone, interrupts adolescent) parenting coded during two challenging parent-adolescent discussion tasks using the Parent-Adolescent Interaction Task (PAIT) Coding System | Parental emotional expression | Emotional processing (reactivity & regulation)<br><br><u>Paradigm:</u> Viewing of images with negative, neutral, and positive emotional valence (IAPS)<br><u>Emotion:</u> Negative, Positive<br><u>Contrast:</u> Negative vs. Neutral, Positive vs. Neutral | ROI analysis of bilateral amygdala, ACC, and vmPFC; exploratory whole-brain analysis | <u>Moderation:</u><br>For girls: ↑maternal negative parenting, ↑right ACC activation to negative emotional images<br><br>For boys: ↑maternal negative parenting, ↓bilateral anterior insula activation and left ACC activation to negative emotional images<br><br>Note: for girls only, ↑left anterior insula activation associated with substance use symptoms and ↑bilateral ACC activation associated with depressive symptoms | Sex                                    |
| Farber et al., 2017             | Adolescents: N=232 (117 females), healthy and youth at high familial risk for depression (N=120); age 12-15y (M=13.59)                         | Adolescent-report of family-related emotion socialization factors: Affective responsiveness and general functioning subscales from the Family Assessment Device (FAD)                                                                                  | Family emotional climate      | Emotional processing (reactivity & regulation)<br><br><u>Paradigm:</u> Matching of faces or shapes<br><u>Emotion:</u> Angry, fearful faces<br><u>Contrast:</u> Angry vs. Control; fearful vs. Control                                                       | ROI analysis of amygdala                                                             | <u>Moderation:</u> ↑affective responsiveness, ↑left amygdala activation to angry faces for youth who reported low levels of recent life stressors                                                                                                                                                                                                                                                                                  | Youth perception of recent life stress |



## PARENTING AND NEURAL SUBSTRATES OF ER

|                            |                                                                                                                                                                                                                                         |                                                                                                                                                                                                                                                                  |                               |                                                                                                                                                                                                                                                                                                                           |                                                                                                                                                                 |                                                                                                                                                                                                                                                                                                                                                                                                                                                                                                                                            |                                       |
|----------------------------|-----------------------------------------------------------------------------------------------------------------------------------------------------------------------------------------------------------------------------------------|------------------------------------------------------------------------------------------------------------------------------------------------------------------------------------------------------------------------------------------------------------------|-------------------------------|---------------------------------------------------------------------------------------------------------------------------------------------------------------------------------------------------------------------------------------------------------------------------------------------------------------------------|-----------------------------------------------------------------------------------------------------------------------------------------------------------------|--------------------------------------------------------------------------------------------------------------------------------------------------------------------------------------------------------------------------------------------------------------------------------------------------------------------------------------------------------------------------------------------------------------------------------------------------------------------------------------------------------------------------------------------|---------------------------------------|
| Gee et al., 2014           | Children: N=23, healthy; age 4-10y (M=7.34)<br><br>Adolescents: N=30, healthy; age 11-17 (M=14.21)                                                                                                                                      | Youth-report of parenting quality: Attachment scale from the Security Style Questionnaire<br><br>Note: Youth reported on attachment to their (self-nominated) attachment figure                                                                                  | N/A (parenting style/quality) | Functional connectivity (gPPI)<br><br><u>Paradigm</u> : Viewing of alternating blocks mother/female stranger emotional faces<br><u>Emotion</u> : Happy, neutral<br><u>Contrast</u> : Mother vs. stranger                                                                                                                  | amygdala–mPFC circuitry                                                                                                                                         | -Children showed inverse amygdala-dIPFC connectivity patterns to mothers' faces only<br>-Adolescents showed inverse amygdala-dmPFC connectivity patterns to mothers' and strangers' faces<br><br>Note: Youth with inverse amygdala-dmPFC connectivity patterns had 1) ↓separation anxiety, and 2) ↑attachment to mother (vs. youth with positive functional connectivity patterns)                                                                                                                                                         | Developmental timing of brain measure |
| Kopala-Sibley et al., 2018 | Children: N=79, healthy (oversampled for high temperamental negative emotionality/low positive emotionality)<br>-parenting measure at age 3y (M=3.44)<br>-brain measure at age 10y (M=10.27)<br><br>(73 with useable neuroimaging data) | Observed maternal negative emotion and parenting behaviors: Hostility coded during parent-child interactions (from Teaching Tasks Battery)<br><br>Mother-report of parental behavior: Regulation subscale from the Parenting Styles and Dimensions Questionnaire | N/A (parenting style/quality) | Functional connectivity (PPI)<br><br><u>Paradigm 1</u> : viewing emotional facial expressions<br><u>Emotion</u> : Neutral, sad, happy (control=houses);<br><u>Contrast</u> : Sad vs neutral;<br><br><u>Paradigm 2</u> : Monetary reward task<br><u>Emotion</u> : Reward (gain), loss<br><u>Contrast</u> : Reward vs. loss | amygdala–whole brain connectivity during processing of emotional faces;<br><br>ventral striatum– and ACC–whole brain connectivity during a monetary reward task | -For sad-neutral faces contrast: ↑maternal hostility, ↑inverse right amygdala-right insula connectivity, ↑inverse right amygdala-bilateral dmPFC connectivity, and ↑inverse right amygdala-operculum<br><br>-For reward-loss contrast: ↑maternal hostility, ↑inverse left ventral striatum-right posterior OFC and ↑inverse left ventral striatum-IFG connectivity<br>-↑maternal regulation, ↑positive ACC-bilateral insula connectivity, ↑positive ACC-bilateral anterior striatum connectivity, and ↑positive ACC-operculum connectivity |                                       |

## PARENTING AND NEURAL SUBSTRATES OF ER

|                      |                                                                                                                                                                                                |                                                                                                                                                                                                                                                                       |                               |                                                                                                                                                                                                                                                                                                                                        |                                             |                                                                                                                                                                                                                                                                                                                                                                                                                                                                                                                                                                                                                                                                                |                                                                              |
|----------------------|------------------------------------------------------------------------------------------------------------------------------------------------------------------------------------------------|-----------------------------------------------------------------------------------------------------------------------------------------------------------------------------------------------------------------------------------------------------------------------|-------------------------------|----------------------------------------------------------------------------------------------------------------------------------------------------------------------------------------------------------------------------------------------------------------------------------------------------------------------------------------|---------------------------------------------|--------------------------------------------------------------------------------------------------------------------------------------------------------------------------------------------------------------------------------------------------------------------------------------------------------------------------------------------------------------------------------------------------------------------------------------------------------------------------------------------------------------------------------------------------------------------------------------------------------------------------------------------------------------------------------|------------------------------------------------------------------------------|
| Marusak et al., 2017 | Children: N=27, healthy (urban, lower income), ages 9-16y (M=11.96)<br>-parenting measure at age 3y (M=3.44)<br>-brain measure at age 10y (M=10.27)<br><br>(73 with useable neuroimaging data) | "Youth"-report of (retrospective, first 16 years of life) maternal and paternal behaviors: Overprotection/control and care subscales from the Parent Bonding Behavioral Instrument (PBI)                                                                              | N/A (parenting style/quality) | Emotional processing (reactivity & regulation)<br><br><u>Paradigm:</u> Identify whether face stimulus is congruent or incongruent with affect or gender labels<br><u>Emotion:</u> Fearful, happy faces<br><u>Non-emotion:</u> Female, male<br><u>Contrast:</u> Congruent vs. Incongruent in Emotional vs. Non-emotional task condition | ROI analysis of anterior insula, dACC, rACC | ↑maternal and ↑maternal control, ↓left anterior insula activation to incongruent emotional stimuli                                                                                                                                                                                                                                                                                                                                                                                                                                                                                                                                                                             |                                                                              |
| Morgan et al., 2014  | N=120 (all male), healthy (but oversampled for high SES stress);<br>-parenting measure at ages 1.5y & 2y (preschool) as well as 10y & 11y (adolescence)<br>-brain measure at age 20y           | Observed maternal warmth: Global warmth/positive emotion coded during parent-child interaction tasks using the Early Parenting Coding System (early childhood) and using a 9-point global rating scale during challenging parent-child discussion tasks (adolescence) | Parental emotion expression   | Emotional processing (reactivity & regulation): Monetary Reward/Loss anticipation & outcome<br><br><u>Paradigm:</u> Guessing Task<br><u>Emotion:</u> Reward (gain), loss<br><u>Contrast:</u> Reward anticipation vs. baseline; Reward outcome vs. baseline, loss anticipation vs. baseline; loss outcome vs. baseline                  | ROI analysis of dmPFC, striatum             | <u>Moderation (developmental timing):</u><br>-↑maternal warmth in early childhood, ↓dmPFC to loss outcome;<br>-↑maternal warmth during adolescence, ↓dmPFC activation during reward outcome<br>-↑maternal warmth during adolescence, ↓caudate activation during loss outcome<br><br><u>Moderation (maternal depression):</u><br>-↓maternal warmth during early childhood, ↓dmPFC, ↑striatal activation to reward anticipation and ↑striatal activation to loss anticipation and reward outcome for boys whose mothers experienced depression<br>-↓maternal warmth during adolescence, ↑caudate activation to reward anticipation for boys whose mothers experienced depression | Developmental timing of parenting experience; maternal history of depression |

## PARENTING AND NEURAL SUBSTRATES OF ER

|                                  |                                                                                                                      |                                                                                                                                                                                                               |                                                               |                                                                                                                                                                                                                                                        |                                                                                                                      |                                                                                                                                                                                                                                                                                                                                                                                                                                                                                                                                                                                                                                                                                                                               |     |
|----------------------------------|----------------------------------------------------------------------------------------------------------------------|---------------------------------------------------------------------------------------------------------------------------------------------------------------------------------------------------------------|---------------------------------------------------------------|--------------------------------------------------------------------------------------------------------------------------------------------------------------------------------------------------------------------------------------------------------|----------------------------------------------------------------------------------------------------------------------|-------------------------------------------------------------------------------------------------------------------------------------------------------------------------------------------------------------------------------------------------------------------------------------------------------------------------------------------------------------------------------------------------------------------------------------------------------------------------------------------------------------------------------------------------------------------------------------------------------------------------------------------------------------------------------------------------------------------------------|-----|
| Pozzi et al.,<br><i>in press</i> | Children, N=86 (49 females), healthy<br>-parenting measures at age 8-9y<br>-brain measure at age 9-10.5y (M = 10.01) | Observed maternal positive and negative behaviors during parent-child interaction tasks, i.e., Pleasant Event Schedule and Problem-Solving Interaction                                                        | Parental emotion expression; positive parenting style/quality | Functional connectivity (gPPI)<br><br>Emotional processing (reactivity & regulation)<br><br><u>Paradigm</u> : Matching faces or shapes<br><u>Emotion</u> : Fearful, angry facial expressions<br><u>Contrast</u> : Emotional (fearful, angry) vs. shape | Fronto-amygdala functional connectivity<br><br>ROI analysis of amygdala activation; exploratory whole brain analysis | ↑maternal negative behavior during problem-solving interaction, ↑(positive) amygdala-and-superior parietal lobe connectivity<br><br><u>Note</u> : Positive connectivity between left amygdala and right parietal lobe greater in boys vs. girls<br><br>↑maternal negative behavior during problem-solving interaction, ↑amygdala activation to negative (angry, fearful) faces<br><br>↑maternal communicative behavior (positive parenting style/quality) during problem-solving and event-planning interactions, ↑bilateral amygdala<br><br><u>Moderation (gender)</u> :<br>-for girls: ↑maternal negative behavior during event-planning interaction, ↓lingual gyrus amygdala activation to negative (angry, fearful) faces | Sex |
| Romund et al., 2016              | Adolescents: N=83 (43 females), healthy; age 13-16y (M=14.48)                                                        | Adolescent-report of maternal parenting behavior from warmth/support, psychological pressure, and demands/control subscales on the Zurich Brief Questionnaire for the Assessment of parenting behaviors (ZKE) | N/A (parenting style/quality)                                 | Emotional processing (reactivity & regulation)<br><br><u>Paradigm</u> : Matching faces or shapes<br><u>Emotion</u> : Fearful, happy, angry facial expressions<br><u>Contrast</u> : Emotional (fearful, happy, angry) vs. neutral (e.g., calm) face     | ROI analysis of amygdala, hippocampus, fusiform gyrus                                                                | ↓maternal warmth/support, ↑left amygdala activation to negative (angry, fearful) faces<br><br><u>Note</u> : Trend for ↑maternal warmth/support, ↓left amygdala activation to happy faces                                                                                                                                                                                                                                                                                                                                                                                                                                                                                                                                      |     |
| Schneider et al., 2012           | Adolescents: N=64, healthy; age 14y (M=14.24)                                                                        | Mother-report of interpersonal style: Love/affiliation subscale from the Inventory of Interpersonal Problems (IIP)                                                                                            | N/A (parenting style/quality)                                 | Emotional processing (reactivity & regulation): Monetary reward/loss anticipation & outcome<br><br><u>Paradigm</u> : Guessing Task<br><u>Emotion</u> : Reward                                                                                          | ROI analysis of ventral striatum, caudate                                                                            | <u>Moderation (sex)</u> :<br>For girls: ↑maternal affiliation, ↑ventral striatal, caudate activation to reward gain vs. baseline                                                                                                                                                                                                                                                                                                                                                                                                                                                                                                                                                                                              | Sex |

## PARENTING AND NEURAL SUBSTRATES OF ER

|                       |                                                                                                  |                                                                                                                                                                                     |                               |                                                                                                                                                                                                                                                                                                           |                                                                                |                                                                                                                                                                                                                                                                                                                                                                          |                         |
|-----------------------|--------------------------------------------------------------------------------------------------|-------------------------------------------------------------------------------------------------------------------------------------------------------------------------------------|-------------------------------|-----------------------------------------------------------------------------------------------------------------------------------------------------------------------------------------------------------------------------------------------------------------------------------------------------------|--------------------------------------------------------------------------------|--------------------------------------------------------------------------------------------------------------------------------------------------------------------------------------------------------------------------------------------------------------------------------------------------------------------------------------------------------------------------|-------------------------|
|                       |                                                                                                  |                                                                                                                                                                                     |                               | (gain), loss<br><u>Contrast:</u> Reward gain/loss vs. baseline                                                                                                                                                                                                                                            |                                                                                |                                                                                                                                                                                                                                                                                                                                                                          |                         |
| Tan et al., 2014      | Adolescents: N=40 (25 female), healthy and MDD (N=14); ages 11-17 (M=14.73y)                     | Observed maternal negative emotion: Negative affect (second-by-second) coded during a supportive parent-adolescent interaction task using the Specific Affect Coding System (SPAFF) | Parental emotional expression | Emotional processing (reactivity & regulation): Social reward/loss (i.e., peer acceptance/ rejection)<br><br><u>Paradigm:</u> Peer Evaluation task (Chat Game)<br><br><u>Emotion:</u> Acceptance (reward) vs. rejection<br><br><u>Contrast:</u> Peer rejection vs. baseline, peer acceptance vs. baseline | ROI analysis of amygdala, anterior insula, nucleus accumbens, sgACC, and vIPFC | -↑maternal negative affect, ↓amygdala, anterior insula, and left nucleus accumbens activation to peer acceptance<br>-↑maternal negativity, ↓sgACC activation to peer acceptance for depressed youth                                                                                                                                                                      | Youth depression status |
| Thijssen et al., 2017 | Children: N=124, healthy<br>-parenting measure at age 4y<br>-brain measure at age 6-10y (M=8.04) | Observed maternal, parental, and combined parenting quality: Sensitivity coded during parent-child interactions (from Teaching Tasks Battery) using the Erickson Rating Scale       |                               | <u>Paradigm:</u> resting-state functional connectivity<br><br>Resting-state function neuroimaging (Rs-fMRI)                                                                                                                                                                                               | amygdala-dmPFC (inclusive of MFG, mOFC, and ACC) circuit                       | -↑child age associated with ↑inverse amygdala-MdPFC functional connectivity, if mothers were low in sensitivity<br>-child age not related to connectivity if mothers were high in sensitivity<br>-↑child age associated with ↑inverse amygdala-ACC functional connectivity if mothers were low in sensitivity<br>-no significant effects found with paternal sensitivity |                         |

## PARENTING AND NEURAL SUBSTRATES OF ER

|                     |                                                               |                                                                                                                                                                                                                              |                               |                                                                                                                                                                                                                                                                                                                       |                                                                                      |                                                                                                                                                                                                                                                                                                                                                  |                             |
|---------------------|---------------------------------------------------------------|------------------------------------------------------------------------------------------------------------------------------------------------------------------------------------------------------------------------------|-------------------------------|-----------------------------------------------------------------------------------------------------------------------------------------------------------------------------------------------------------------------------------------------------------------------------------------------------------------------|--------------------------------------------------------------------------------------|--------------------------------------------------------------------------------------------------------------------------------------------------------------------------------------------------------------------------------------------------------------------------------------------------------------------------------------------------|-----------------------------|
| Turpyn et al., 2017 | Adolescents: N=64 (31 female), healthy; ages 12-14y (M=12.55) | Mother-reported affect: Negative affect from the sadness, anger, fear, and anxiety subscales on the Differential Emotions Scale (DES-R); Mother-reported emotion regulation: Difficulties in Emotion Regulation Scale (DERS) | Parental emotional expression | Emotional processing (reactivity & regulation)<br><br><u>Paradigm:</u> Viewing of images with negative, neutral, and positive emotional valence (drawn from the International Affective Picture System)<br><br><u>Emotions:</u> Negative, positive<br><br><u>Contrast:</u> Negative vs. neutral, positive vs. neutral | ROI analysis of bilateral amygdala, ACC, and vmPFC; exploratory whole-brain analysis | -↑maternal negative emotion, ↑ACC and vmPFC activation to negative and positive emotional images<br>-↑maternal negative emotion, ↑amygdala activation to negative images only<br><br><u>Moderation:</u> ↑maternal negative emotion, ↑bilateral amygdala and vmPFC to negative emotional stimuli for mothers with emotion regulation difficulties | Maternal emotion regulation |
|---------------------|---------------------------------------------------------------|------------------------------------------------------------------------------------------------------------------------------------------------------------------------------------------------------------------------------|-------------------------------|-----------------------------------------------------------------------------------------------------------------------------------------------------------------------------------------------------------------------------------------------------------------------------------------------------------------------|--------------------------------------------------------------------------------------|--------------------------------------------------------------------------------------------------------------------------------------------------------------------------------------------------------------------------------------------------------------------------------------------------------------------------------------------------|-----------------------------|

*Notes.* ACC=anterior cingulate cortex; PFC=prefrontal cortex; OFC=orbitofrontal cortex; sFG=superior portion of the fusiform gyrus; dACC=dorsal anterior cingulate cortex; rACC=rostral anterior cingulate cortex; mACC=medial anterior cingulate cortex; pgACC= pregenual anterior cingulate cortex; sgACC=subgenual anterior cingulate cortex; dmPFC=dorsomedial prefrontal cortex; dlPFC=dorsolateral prefrontal cortex; vmPFC=ventromedial prefrontal cortex; vlPFC=ventrolateral prefrontal cortex; IFG= inferior frontal gyrus; GM=gray matter; WM=white matter; HPA=hypothalamic-pituitary-adrenal axis; ROI=Region-of-interest.

If study included only broader measure(s) of parenting quality, style, or parent-child relationship quality, we describe the parental ERSB(s) that might be theoretically related to the broader parenting index.

## PARENTING AND NEURAL SUBSTRATES OF ER

Supplemental Information: Table 2. Glossary of key neuroscience terms

**brain volume** - measurement of the size of the brain or a specific anatomical structure within the brain

**diffusion tensor imaging** - neuroimaging technique that measures white matter structural integrity by detecting how water travels along the white matter tracts in the brain

**functional connectivity** - the temporal correlation of neural activity (i.e., measured using the blood-oxygen-level-dependent (BOLD) signal) between brain regions in response to a stimulus or while at-rest (i.e., not stimulus dependent)

**gray matter** - structural component of the central nervous system that contains the cell bodies (i.e., soma), dendrites and axon terminals of neurons

**gray matter volume** - the amount of gray matter that lies between the grey-white interface and the pia mater within a specific brain structure or region

**gray matter thinning** - atrophy of neuronal cell bodies due to the loss of synapses, resulting in reduced gray matter levels or thickness

**morphology** - the study of the form or structure of the brain

**neural circuitry** - synaptic connections between populations of neurons that are structurally and functionally defined

**neural network** - anatomically-defined brain regions that are functionally connected, in response to a particular type of stimulus or while at-rest

**structural connectivity** - indicates levels of white matter integrity via fractional anisotropy, which is a measure of axonal myelin insulation of the white matter tracts

**white matter** - structural component of the central nervous system comprised of myelinated axons which connect neuronal cell bodies (i.e., soma); a collection of axons is referred to as tracts
